# Supplementary material for: Kinetically favorable edge-type iron–cobalt atomic pair sites synthesized via a silica xerogel approach for efficient bifunctional oxygen electrocatalysis
Source: Royal Society of Chemistry journal article supplement (doi:10.1039/d2ta08257h), 2022-12-02
Supplement: d2ta08257h1.pdf [file d2ta08257h1.pdf]

## Supporting Information

# Kinetically Favorable Edge-Type Iron-Cobalt Atomic Pair Sites Synthesized via a Silica Xerogel Approach for Efficient Bifunctional Oxygen Electrocatalysis

*Maosong Liu,<sup>a</sup> Xianhe Lv,<sup>a</sup> Lijuan Wang,<sup>a</sup> Kangmin Chen,<sup>b</sup> Yanxiao Li,<sup>b</sup> Tao Sun,<sup>a</sup> Jianming Zhang,<sup>a\*</sup> Long Zhang,<sup>a\*</sup> Shuhui Sun<sup>c\*</sup>*

<sup>a</sup>Institute of Quantum and Sustainable Technology (IQST), School of Chemistry and Chemical Engineering, Jiangsu University, Zhenjiang, 212013, P. R. China.

<sup>b</sup>Instrumental Analysis Center, Jiangsu University, Zhenjiang, 212013, P. R. China

<sup>c</sup>Institut National de la Recherche Scientifique (INRS), Énergie Matériaux Télécommunications Research Centre, Québec J3X 1P7, Canada

Corresponding author e-mail: [zhangjm@ujs.edu.cn](mailto:zhangjm@ujs.edu.cn) (J.Zhang), [longzhang@ujs.edu.cn](mailto:longzhang@ujs.edu.cn) (L.Zhang), [shuhui.sun@inrs.ca](mailto:shuhui.sun@inrs.ca) (S.Sun)

## Experimental section

### Materials

Chemicals: Ferrous gluconate hydrate, sodium gluconate and glucosamine hydrochloride were purchased from Shanghai Aladdin Biochemical Technology Co. Ltd. Cobalt chloride hexahydrate ( $\text{CoCl}_2 \cdot 6\text{H}_2\text{O}$ ), ethanol, tetraethyl orthosilicate (TEOS), potassium hydroxide (KOH), hydrochloric acid (HCl) and hydrofluoric acid (HF) were purchased from Sinopharm Chemical Reagent Co. Ltd. All the chemicals were used as received without further purification. Water was purified by a Millipore water system with a resistivity of  $18.2 \text{ M}\Omega \cdot \text{cm}$  at  $25^\circ\text{C}$ .

### *In-situ* synthesis of xerogel

To 13 mL of  $\text{H}_2\text{O}$ , 0.3 g of sodium gluconate and 0.15 g of  $\text{CoCl}_2 \cdot 6\text{H}_2\text{O}$  were added and stirred at room temperature to prepare cobalt gluconate. Two hours later, 1.5 g of glucosamine hydrochloride and 0.15 g of ferrous gluconate hydrate were added to the above solution. After all the solids were dissolved completely, 10 mL of ethanol and 10 mL of TEOS were introduced, followed by adding 50  $\mu\text{L}$  of HCl as the catalyst. This solution was stirred ceaselessly at room temperature until the formation of silica sol-gel. The sol-gel was then freeze-dried for 12 h to form dry xerogel powder.

### *Ex-situ* synthesis of xerogel

Firstly, 10 mL of ethanol and 10 mL of TEOS were introduced to 13 mL of  $\text{H}_2\text{O}$ , followed by adding 50  $\mu\text{L}$  of HCl and stirred ceaselessly at room temperature until the formation of silica sol-gel. The sol-gel was then freeze-dried for 12 h to form dry silica xerogel powder. Then, to 13 mL of  $\text{H}_2\text{O}$ , 0.3 g of sodium gluconate and 0.15 g of  $\text{CoCl}_2 \cdot 6\text{H}_2\text{O}$  were added and stirred at room temperature. Two hours later, 1.5 g of glucosamine hydrochloride, 0.15 g of ferrous gluconate hydrate and 5 g of silica xerogel powder were added to the above solution. This solution was stirred ceaselessly at room temperature until the formation of silica sol-gel. The sol-gel was then freeze-dried for 12 h to form dry xerogel powder.

### Preparation of ISG Fe,Co-NC

Typically, 1 g of the xerogel powder (prepared by *in-situ* method) and 1 g of urea were fully grounded and mixed. The collected powder was then thermally treated at  $900^\circ\text{C}$  for 2 h under flowing Ar (the heating rate was set to be  $5^\circ\text{C}/\text{min}$ ). The black powder was etched overnight with

HF solution, followed by washing with deionized water and ethanol to remove acid residue. The etched powder was dried in vacuum for 8 h and underwent the second thermal treatment at 900 °C for 2 h under flowing argon (Ar) gas with a heating rate of 5 °C/min. The sample was cooled naturally to room temperature, yielding the ISG Fe,Co-NC. The preparation of ESG Fe,Co-NC was the same as that of ISG Fe,Co-NC. The ESG Fe,Co-NC was prepared by the same condition but the xerogel powder that was prepared by *ex-situ* method was added.

## Electrochemical evaluation

A three-electrode system was used for electrochemical evaluation, which was controlled by CHI760e electrochemical station (CH Instrument, USA). The working electrode was a rotating ring-disk electrode (RRDE, Pine Instrument), and the disk electrode is a glassy carbon electrode with a diameter of 4 mm. The counter electrode is platinum wire while the reference electrode is Ag/AgCl electrode in which the internal electrolyte is saturated potassium chloride solution.

The ink dripped on the electrode surface was prepared by the following method: typically, 5 mg of the catalyst sample, 500 µL of H<sub>2</sub>O, 500 µL of ethanol and 40 µL of 5% Nafion solution were mixed together, followed by ultrasonic dispersion for more than 30 minutes to form homogeneous ink. Afterward, 10 µL of the ink was dropped on the electrode surface and left until the catalyst was evenly dispersed on the electrode surface and evaporation of ethanol and H<sub>2</sub>O. This electrode was conducted for the electrochemical test. The cyclic voltammograms (CVs) were obtained at 0.1 M of KOH of high purity N<sub>2</sub> or O<sub>2</sub> (scan rate: 50 mV s<sup>-1</sup>). All linear sweep voltammograms (LSVs) were measured in 0.1 M of KOH saturated with high purity O<sub>2</sub> (scan rate: 10 mV s<sup>-1</sup>; rotational speed: 400-2500 rpm).

The electron transfer number (n, S1) and the yield of the intermediate (HO<sub>2</sub><sup>-</sup>, S2) during the ORR process were determined from rotating ring-disk electrode measurements and calculated by the following equations:

$$n = \frac{4I_d}{\left(I_d + \frac{I_r}{N}\right)} \quad S1$$

$$HO_2^- (\%) = \frac{200\left(\frac{I_r}{N}\right)}{I_d + \frac{I_r}{N}} \quad S2$$

where  $I_d$ ,  $I_r$ , and  $N$  denote disk current, ring current and collection efficiency of Pt ring (0.37), respectively.

All the recorded potentials were corrected to RHE using the following equation:

$$E_{RHE} = E_{Ag/AgCl} + 0.059PH + 0.197 \quad S3$$

where  $E_{RHE}$  and  $E_{Ag/AgCl}$  refer to potential relevant to reversible hydrogen electrode (RHE) and Ag/AgCl electrode, respectively.

## ZAB test

Zinc-air battery tests: A home-constructed Zn-air cell was used to assess the performance of the ZAB. The electrolyte was a mixed solution of 0.2 M  $ZnCl_2$  and 6 M KOH. The anode was a polished Zn plate with a 0.3 mm thickness. the gas diffusion layer (GDL) at the air cathode was created by hot-pressing carbon black onto the surface of carbon paper for 1 min at 80 °C. The catalyst ink was made by ultrasonically combining 1 mL of  $H_2O$  and 1 mL of ethanol with 10 mg as-prepared sample and 80  $\mu$ L 5% Nafion solution (catalyst loading: 2 mg  $cm^{-2}$ ). The achieved catalyst layer was dried in a vacuum oven under 60 °C. The charge-discharge polarization curve was obtained by LSV test (scan rate: 10 mV  $s^{-1}$ ). And the current density for the charge-discharge cycle curve test is set at 10 mA  $cm^{-2}$  and 20 mA  $cm^{-2}$ , respectively. The time of each cycle is set as 1 h (including 30 min for charging time and 30 min for discharging time).

The power density was calculated according to the equation:

$$power\ density = current\ density * voltage \quad S4$$

The specific capacity was calculated according to the equation:

$$specific\ capacity = \frac{current * test\ hours}{consumed\ zinc\ plate\ mass} \quad S5$$

## Characterizations

The morphology of the samples was characterized using a Talos F200X transmission electron microscopy (TEM) at Thermo Fisher Nanoport Shanghai. Aberration corrected high-angle annular dark-field scanning TEM (HAADF-STEM) was conducted at Thermo Fisher Nanoport Europe (Netherland) using a Spectra 300. X-ray Photoelectron Spectroscopy (XPS) measurements were performed on ESCALAB Xi+ at Thermo Fisher Nanoport Shanghai. Raman spectra were recorded with a Thermo Fisher DXR with a laser wavelength of 532 nm. X-Ray diffraction (XRD) patterns

were collected using a Bruker D8 with the X-ray source being Cu-K $\alpha$  radiation operated at 3 kV. Inductively coupled plasma optical emission spectrometer (ICP-OES) was carried out with Agilent 720ES. Synchrotron X-ray absorption spectroscopy (XAS) spectra were tested in Taiwan Light Source (Hard x-ray, 5-40K eV). Brunauer-Emmett-Teller (BET) experiments were conducted at 77 K on an AUTOSORB IQ Instrument, Quantachrome. Micro computed tomography (Micro-CT) was performed using inspeXio SMX-225CT FPD HR at Shimatsu Co. Ltd Shanghai.

## Theoretical calculation

First-principles calculations were carried out using DFT with generalized gradient approximation (GGA) of Perdew-Burke-Ernzerhof (PBE) implemented in Vienna Ab-Initio Simulation Package (VASP)<sup>1, 2</sup>. The valence electronic states were expanded on the basis of plane waves with the core-valence interaction represented using the projector augmented plane wave (PAW) approach<sup>3</sup> and a cutoff of 520 eV. Convergence is achieved when the forces acting on ions become smaller than 0.02 eV/Å.

For ORR calculation, the four-electrons pathway under base condition are generally proceed in the following steps:<sup>4</sup>

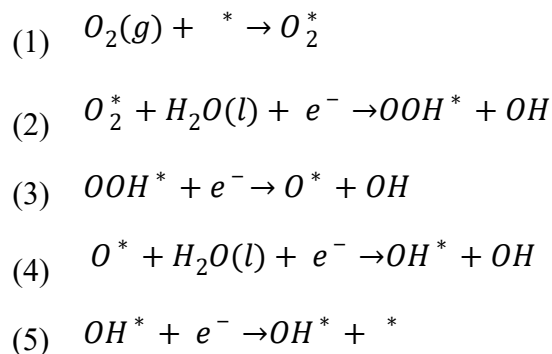

The reaction free energy ( $\Delta G$ ) is further calculated using the following formula:

$$\Delta G = \Delta H - T\Delta S - qU + kBT \ln 10 \times pH$$

where  $\Delta H$  is the reaction enthalpy of an elementary step and estimated by the reaction energy ( $\Delta E$ ) with zero-point energy (ZPE) correction from DFT calculations;  $T\Delta S$  is the contribution in free energy changes from the entropy;  $U$  is the applied potential in electrode;  $q$  is the charge transfer in each step.

For calculation of OER in an alkaline condition, OER could take place in the following four-electron pathways:<sup>4</sup>

- (1)  $H_2O(l) + * \leftrightarrow HO^* + H^+ + e^- (\Delta G_1)$
- (2)  $HO^* + * \leftrightarrow O^* + H^+ + e^- (\Delta G_2)$
- (3)  $O^* + H_2O(l) + * \leftrightarrow HOO^* + H^+ + e^- (\Delta G_3)$
- (4)  $HOO^* \leftrightarrow O_2(g) + H^+ + e^- (\Delta G_4)$

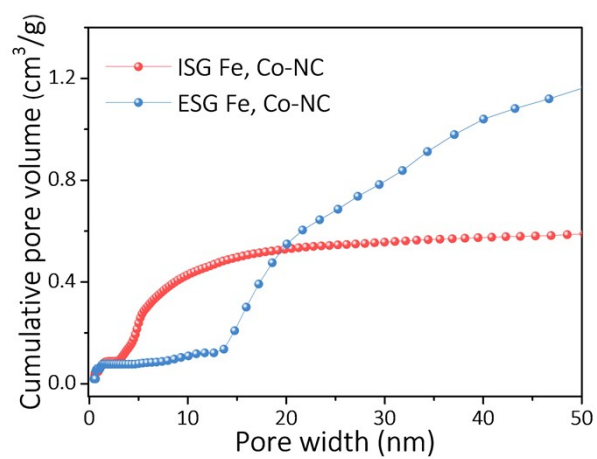

**Figure S1.** Cumulative pore size distribution using QSDFT model.

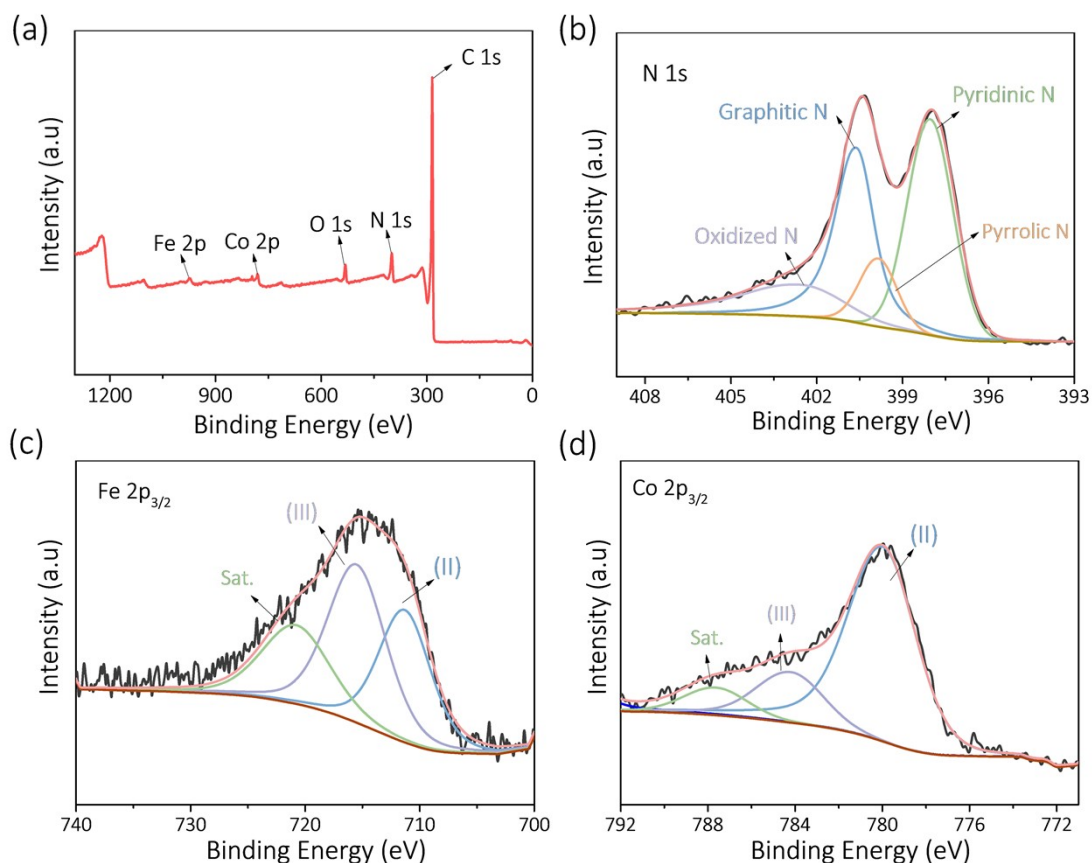

**Figure S2.** XPS survey spectrum (a) and high-resolution XPS spectra of N 1s (b), Fe 2p<sub>3/2</sub> (c) and Co 2p<sub>3/2</sub> (d) of the ISG Fe,Co-NC sample.

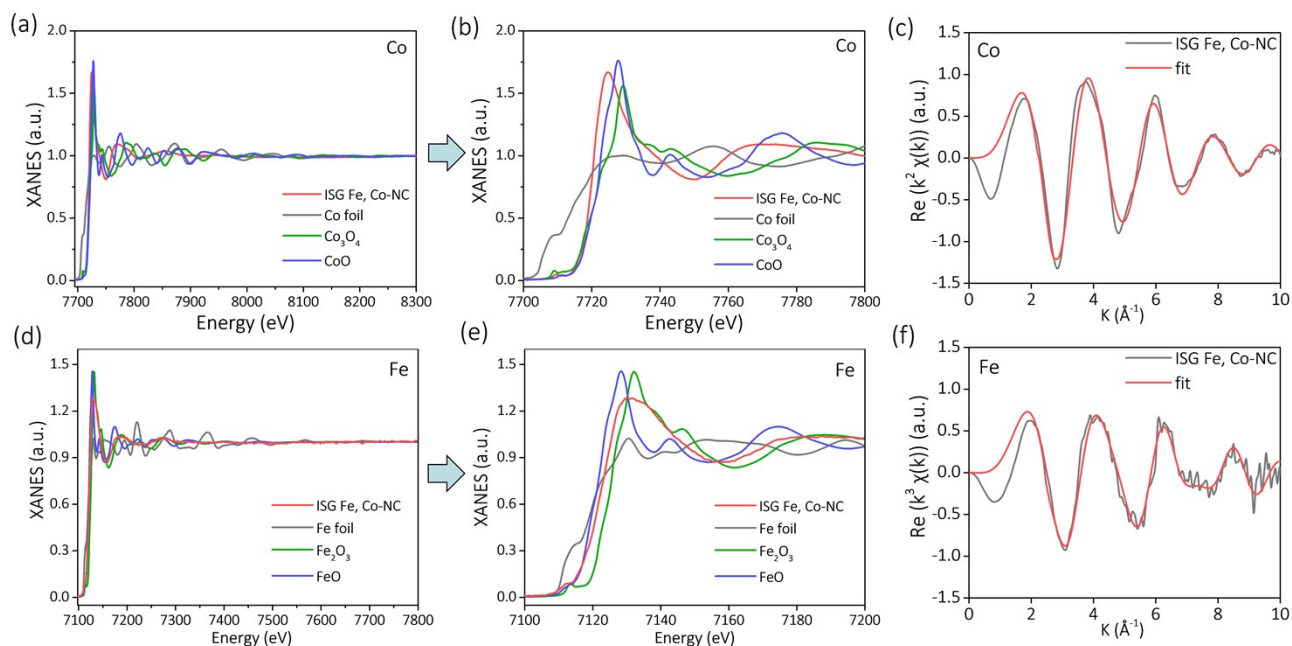

**Figure S3.** (a, b) Co K-edge XANES spectra of ISG Fe,Co-NC and reference samples. (c) Co EXAFS k space fitting curves of ISG Fe,Co-NC. (d, e) Fe K-edge XANES spectra of ISG Fe,Co-NC and reference samples. (f) Fe EXAFS k space fitting curves of ISG Fe,Co-NC.

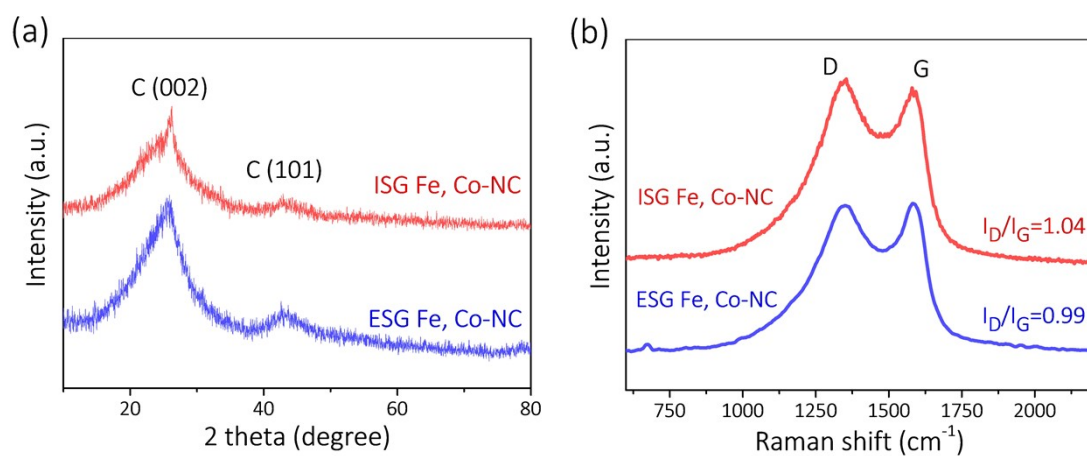

**Figure S4.** XRD pattern (a), Raman spectrum (b) of the ISG Fe,Co-NC and ESG Fe,Co-NC samples.



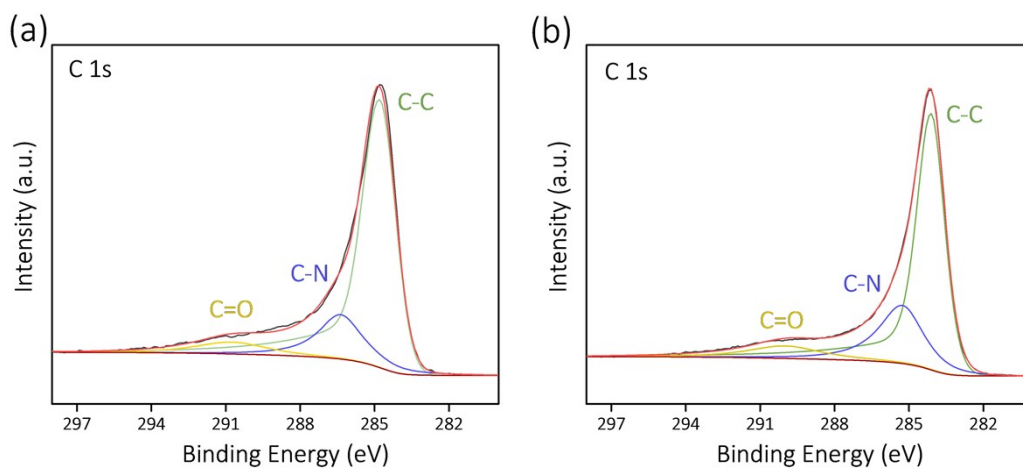

**Figure S5.** C 1s XPS spectra of ESG Fe,Co-NC and ISG Fe,Co-NC.

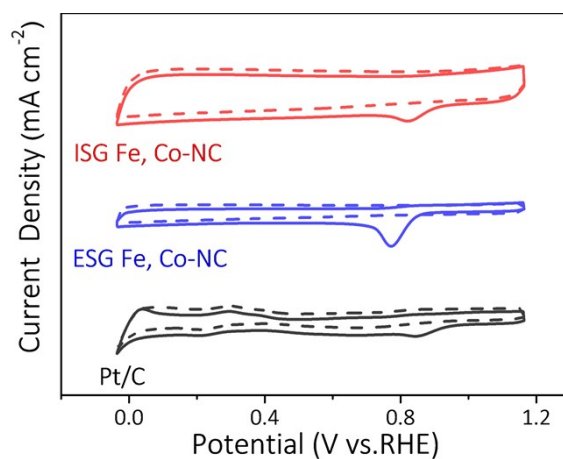

**Figure S6.** CV curves of ISG Fe,Co-NC, ESG Fe,Co-NC and Pt/C catalysts in O<sub>2</sub>-saturated 0.1 M KOH.

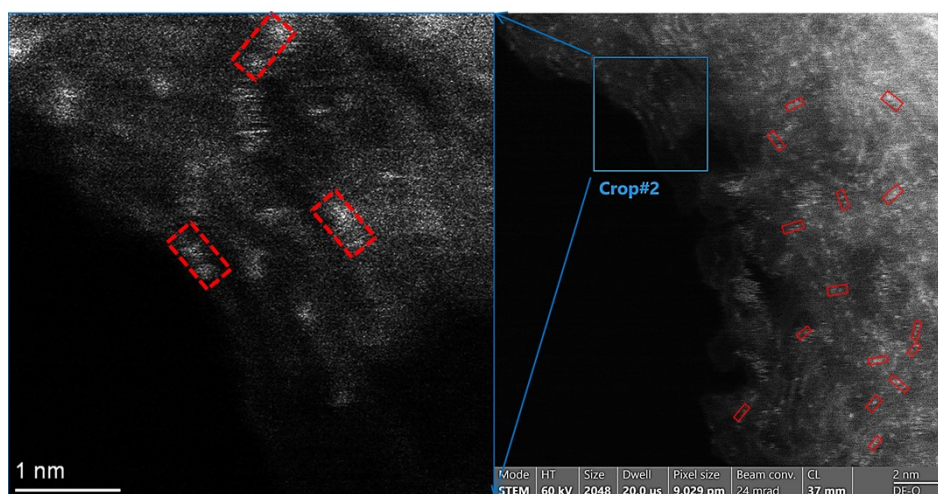

**Figure S7.** HAADF-STEM images of the ISG Fe,Co-NC sample after the cycling (The circles are guides for the eye, marking the possible Fe-Co atom pairs).

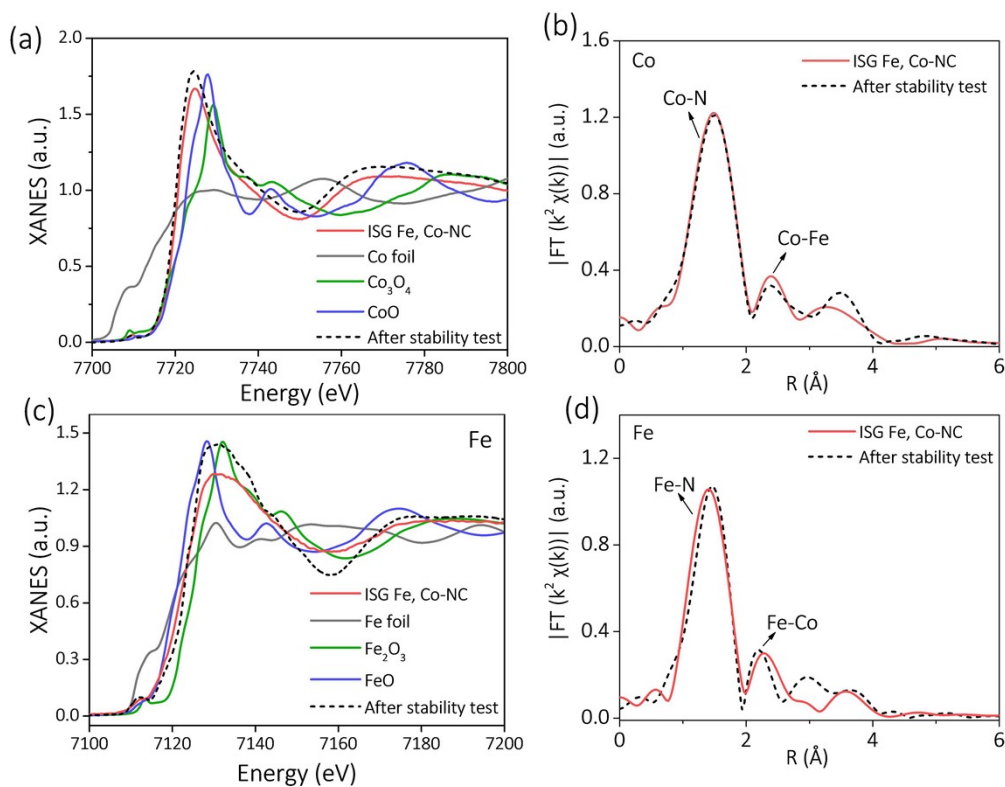

**Figure S8.** (a) Co K-edge XANES and (b) Fourier-transformed EXAFS spectra comparison before and after the cycling of ISG Fe,Co-NC and reference. (c) Fe K-edge XANES and (d) Fourier-transformed EXAFS spectra comparison before and after the cycling of ISG Fe,Co-NC and reference.

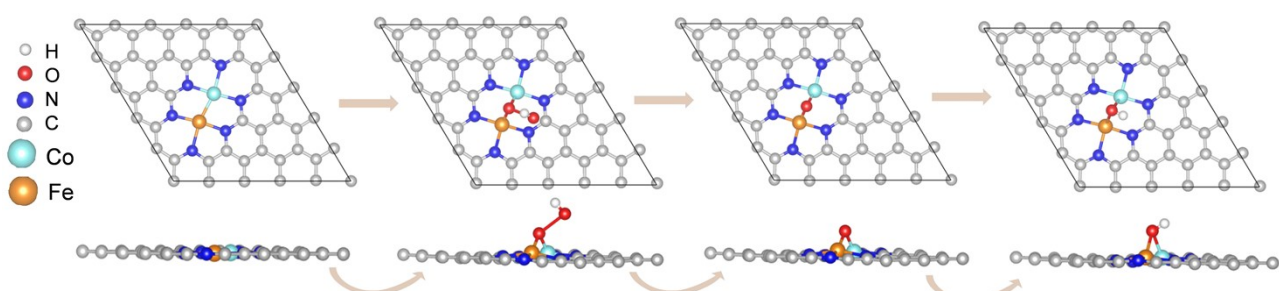

**Figure S9.** Top view and side view of the initial structures after adsorption of  $\text{OOH}^*$ ,  $\text{O}^*$ , and  $\text{OH}^*$  on the in-plane-type  $\text{FeCoN}_6$  model. In particular, the orange, light blue, gray, dark blue, red, and white balls represent Fe-Co, C, N, O, and H atoms, respectively.

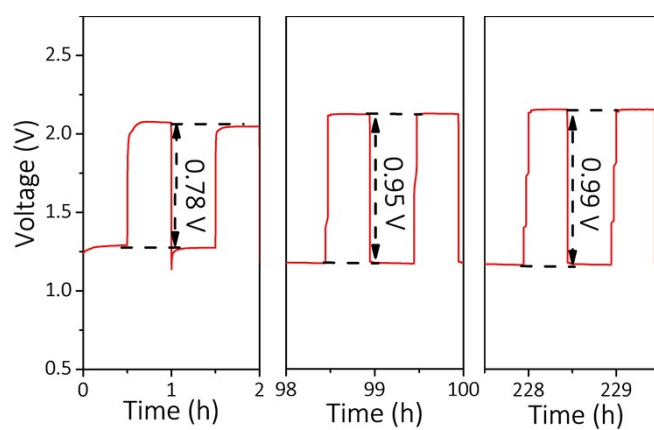

**Figure S10.** Long-term cycling performance of the ZAB with ISG Fe,Co-NC at a current density of  $10 \text{ mA cm}^{-2}$ .

**Table S1.** The surface areas for the specific distribution of pores of ISG Fe,Co-NC and ESG Fe,Co-NC.

| Sample    | ISG Fe,Co-NC                      |                                    | ESG Fe,Co-NC                      |                                    |
|-----------|-----------------------------------|------------------------------------|-----------------------------------|------------------------------------|
| QSDFT*    | Surface area                      | Pore volume                        | Surface area                      | Pore volume                        |
| analysis  | (m <sup>2</sup> g <sup>-1</sup> ) | (cm <sup>3</sup> g <sup>-1</sup> ) | (m <sup>2</sup> g <sup>-1</sup> ) | (cm <sup>3</sup> g <sup>-1</sup> ) |
| < 2 nm    | 329.41                            | 0.136                              | 220.28                            | 0.077                              |
| 2 - 10 nm | 447.58                            | 0.615                              | 13.06                             | 0.033                              |
| > 10 nm   | 11.74                             | 0.207                              | 149.83                            | 1.056                              |
| Total     | 788.73                            | 0.822                              | 383.17                            | 1.166                              |

QSDFT\* means quenched solid density functional theory (QSDFT) analysis.

m<sup>2</sup> g<sup>-1</sup> means the surface area (m<sup>2</sup> g<sup>-1</sup>).

cm<sup>3</sup> g<sup>-1</sup> means pore volume (cm<sup>3</sup> g<sup>-1</sup>).

**Table S2.** Mass fraction content of Co and Fe of ISG Fe,Co-NC and ESG Fe,Co-NC from ICP-OES measurements.

| Catalysts    | Co content (measured by | Fe content (measured by |
|--------------|-------------------------|-------------------------|
|              | ICP, wt%)               | ICP, wt%)               |
| ISG Fe,Co-NC | 2.25                    | 0.62                    |
| ESG Fe,Co-NC | 0.98                    | 0.32                    |

**Table S3.** EXAFS data fitting results of the ISG Fe,Co-NC.

| edge | Path  | N    | R(Å) | $\sigma^2 \cdot 10^{-3}$<br>(Å <sup>2</sup> ) | $\Delta E_0$ (eV) | R-factor |
|------|-------|------|------|-----------------------------------------------|-------------------|----------|
| Fe   | Fe-N  | 3.63 | 1.83 | 9.56                                          | -3.87             | 0.0058   |
|      | Fe-Co | 0.60 | 2.59 | 3.32                                          | -0.38             |          |
| Co   | Co-N  | 3.51 | 1.83 | 5.95                                          | -3.02             | 0.011    |
|      | Co-Fe | 0.48 | 2.46 | 1.02                                          | -0.15             |          |

N is the coordination number; R is the interatomic distance (the bond length between Fe/Co atom and surrounding coordinated N atoms);  $\Delta E_0$  (eV), inner potential correction accounts for the difference in the inner potential between the sample and the reference compound.  $\sigma^2$  is Debye-Waller factor value; R factor indicates the goodness of the fit.

**Table S4.** XPS results analysis of high-resolution C 1s spectrum for the prepared samples.

| Sample       | C-C (%) | C-N (%) | C=O (%) |
|--------------|---------|---------|---------|
| ISG Fe,Co-NC | 76.05   | 17.34   | 6.61    |
| ESG Fe,Co-NC | 67.94   | 23.87   | 8.19    |

**Table S5.** The comparison of essential parameters for evaluating bifunctional electrocatalytic activity for OER and ORR.

| Catalyst                              | $E_{1/2}$ | $E_{j=10}$ | $\Delta E/V$ (vs. RHE) | Reference |
|---------------------------------------|-----------|------------|------------------------|-----------|
| ISG Fe,Co-NC                          | 0.865     | 1.613      | 0.748                  | This work |
| ESG Fe,Co-NC                          | 0.798     | 1.747      | 0.948                  |           |
| Pt/C                                  | 0.851     | /          | 0.776                  |           |
| IrO <sub>2</sub>                      | /         | 1.629      |                        |           |
| Fe-NC/Co-NC mixture                   | 0.849     | 1.703      | 0.854                  |           |
| meso/micro-FeCo-N <sub>x</sub> -CN-30 | 0.886     | 1.67       | 0.78                   | 5         |
| CoNi-SAs/NC                           | 0.76      | 1.57       | 0.81                   | 6         |
| Ni <sub>66</sub> Fe <sub>34</sub> -NC | 0.85      | 1.697      | 0.847                  | 7         |
| Co SA@NCF/CNF                         | 0.88      | 1.63       | 0.75                   | 8         |
| Fe-N <sub>x</sub> -C                  | 0.91      | 1.83       | 0.92                   | 9         |
| Co-NC@LDH                             | 0.8       | 1.619      | 0.819                  | 10        |
| CoSAs@CNTs                            | 0.86      | 1.64       | 0.78                   | 11        |
| Co <sub>x</sub> Ni-N/C                | 0.84      | 1.59       | 0.78                   | 12        |
| Co-POC                                | 0.83      | 1.70       | 0.87                   | 13        |
| Fe-N <sub>4</sub> SAs/NPC             | 0.885     | 1.66       | 0.775                  | 14        |

**Table S6.** The comparison of essential parameters for ISG Fe,Co-NC and ISG Fe-NC/Co-NC

| Catalyst                | Metal content (measured by ICP, wt %) | Mainly mesopore size (nm) | BET surface area (m <sup>2</sup> g <sup>-1</sup> ) |
|-------------------------|---------------------------------------|---------------------------|----------------------------------------------------|
| ISG Fe,Co-NC            | Fe (0.62), Co (2.25)                  | 5 ~ 6                     | 778.73                                             |
| ISG Fe-NC/Co-NC mixture | Fe (0.65), Co (2.28)                  | 4 ~ 6                     | 791.53                                             |

**Table S7.** Gibbs adsorption free energy for adsorbates of edge-type Fe,Co-NC and in-plane-type Fe,Co-NC at different potentials for ORR.

| $G_{\text{ads}}$ (eV)  | $U = 0 \text{ V}$  |                        | $U = 1.23 \text{ V}$ |                        |
|------------------------|--------------------|------------------------|----------------------|------------------------|
|                        | edge-type Fe,Co-NC | in-plane-type Fe,Co-NC | edge-type Fe,Co-NC   | in-plane-type Fe,Co-NC |
| $\text{O}_2(\text{g})$ | 4.92               | 4.92                   | 0                    | 0                      |
| $^*\text{OOH}$         | 4.177              | 4.723                  | 0.487                | 1.033                  |
| $^*\text{O}$           | 2.98               | 3.304                  | 0.52                 | 0.844                  |
| $^*\text{OH}$          | 1.581              | 1.821                  | 0.351                | 0.591                  |
| $\text{H}_2\text{O}$   | 0                  | 0                      | 0                    | 0                      |

**Table S8.** Gibbs free energy change ( $\Delta G$ ) of edge-type Fe,Co-NC and in-plane-type Fe,Co-NC at different potentials for ORR.

| $\Delta G_{\text{ads}}$ (eV) | $U = 0 \text{ V}$  |                        | $U = 1.23 \text{ V}$ |                        |
|------------------------------|--------------------|------------------------|----------------------|------------------------|
|                              | edge-type Fe,Co-NC | in-plane-type Fe,Co-NC | edge-type Fe,Co-NC   | in-plane-type Fe,Co-NC |
| <b>Step1</b>                 | -0.743             | -0.197                 | 0.487                | 1.033                  |
| <b>Step2</b>                 | -1.197             | -1.419                 | 0.033                | -0.189                 |
| <b>Step3</b>                 | -1.399             | -1.483                 | -0.169               | -0.253                 |
| <b>Step4</b>                 | -1.581             | -1.821                 | -0.351               | -0.591                 |

**Table S9.** Gibbs adsorption free energy for adsorbates of edge-type Fe,Co-NC and in-plane-type Fe,Co-NC at different potentials for OER.

| $\Delta G_{\text{ads}}$ (eV) | U = 0 V            |                        | U = 1.23 V         |                        |
|------------------------------|--------------------|------------------------|--------------------|------------------------|
|                              | edge-type Fe,Co-NC | in-plane-type Fe,Co-NC | edge-type Fe,Co-NC | in-plane-type Fe,Co-NC |
| <b>O<sub>2</sub>(g)</b>      | 0                  | 0                      | 0                  | 0                      |
| <b>*OOH</b>                  | 1.581              | 1.821                  | 0.351              | 0.591                  |
| <b>*O</b>                    | 2.98               | 3.304                  | 0.52               | 0.844                  |
| <b>*OH</b>                   | 4.177              | 4.723                  | 0.487              | 1.033                  |
| <b>H<sub>2</sub>O</b>        | 4.92               | 4.92                   | 0                  | 0                      |

**Table S10.** Gibbs free energy change ( $\Delta G$ ) of edge-type Fe,Co-NC and in-plane-type Fe,Co-NC at different potentials for OER.

| $\Delta G_{\text{ads}}$ (eV) | U = 0 V            |                        | U = 1.23 V         |                        |
|------------------------------|--------------------|------------------------|--------------------|------------------------|
|                              | edge-type Fe,Co-NC | in-plane-type Fe,Co-NC | edge-type Fe,Co-NC | in-plane-type Fe,Co-NC |
| <b>Step1</b>                 | 1.581              | 1.821                  | 0.351              | 0.591                  |
| <b>Step2</b>                 | 1.399              | 1.483                  | 0.169              | 0.253                  |
| <b>Step3</b>                 | 1.197              | 1.419                  | -0.033             | 0.189                  |
| <b>Step4</b>                 | 0.743              | 0.197                  | -0.487             | -1.033                 |

## References

1. J. P. Perdew, K. Burke and M. Ernzerhof, *Phys. Rev. Lett.*, 1996, **77**, 3865-3868.
2. G. Kresse and J. Furthmüller, *Phys. Rev. B*, 1996, **54**, 11169-11186.
3. P. E. Blöchl, *Phys. Rev. B*, 1994, **50**, 17953-17979.
4. J. K. Nørskov, J. Rossmeisl, A. Logadottir, L. Lindqvist, J. R. Kitchin, T. Bligaard and H. Jónsson, *J. Phys. Chem. B*, 2004, **108**, 17886-17892.
5. S. Li, C. Cheng, X. Zhao, J. Schmidt and A. Thomas, *Angew. Chem. Int. Ed.*, 2018, **57**, 1856-1862.
6. X. Han, X. Ling, D. Yu, D. Xie, L. Li, S. Peng, C. Zhong, N. Zhao, Y. Deng and W. Hu, *Adv. Mater.*, 2019, **31**, 1905622.
7. M. Ma, A. Kumar, D. Wang, Y. Wang, Y. Jia, Y. Zhang, G. Zhang, Z. Yan and X. Sun, *Appl. Catal. B*, 2020, **274**, 119091.
8. D. Ji, L. Fan, L. Li, S. Peng, D. Yu, J. Song, S. Ramakrishna and S. Guo, 2019, *Adv. Mater.*, **31**, 1808267.
9. J. Han, X. Meng, L. Lu, J. Bian, Z. Li and C. Sun, *Adv. Funct. Mater.*, 2019, **29**, 1808872.
10. D. Chen, X. Chen, Z. Cui, G. Li, B. Han, Q. Zhang, J. Sui, H. Dong, J. Yu, L. Yu and L. Dong, *Chem. Eng. J.*, 2020, **399**, 125718.
11. S. Dilpazir, H. He, Z. Li, M. Wang, P. Lu, R. Liu, Z. Xie, D. Gao and G. Zhang, *ACS Appl. Energy Mater.*, 2018, **1**, 3283-3291.
12. Z. Li, H. He, H. Cao, S. Sun, W. Diao, D. Gao, P. Lu, S. Zhang, Z. Guo, M. Li, R. Liu, D. Ren, C. Liu, Y. Zhang, Z. Yang, J. Jiang and G. Zhang, *Appl. Catal. B*, 2019, **240**, 112-121.
13. B.-Q. Li, C.-X. Zhao, S. Chen, J.-N. Liu, X. Chen, L. Song and Q. Zhang, *Adv. Mater.*, 2019, **31**, 1900592.
14. Y. Pan, S. Liu, K. Sun, X. Chen, B. Wang, K. Wu, X. Cao, W.-C. Cheong, R. Shen, A. Han, Z. Chen, L. Zheng, J. Luo, Y. Lin, Y. Liu, D. Wang, Q. Peng, Q. Zhang, C. Chen and Y. Li, *Angew. Chem. Int. Ed.*, 2018, **57**, 8614-8618.
